# Supplementary material for: Diastolic dysfunction in a pre-clinical model of diabetes is associated with changes in the cardiac non-myocyte cellular composition
Source: PubMed Central journal article supplement (PMC8170962; doi:10.1186/s12933-021-01303-9), 2021-06-01
Supplement: 12933_2021_1303_MOESM1_ESM.pdf [file 12933_2021_1303_MOESM1_ESM.pdf]

## **Additional file 1**

### **Diastolic Dysfunction in a Pre-Clinical Model of Diabetes is Associated with Changes in the Cardiac Non-myocyte Cellular Composition**

*Cardiovascular diabetology*

Charles D. Cohen<sup>1,2,5</sup>, Miles J. De Blasio<sup>1</sup>, Man K. S. Lee<sup>3</sup>, Gabriella E. Farrugia<sup>2</sup>, Darnel Prakoso<sup>1</sup>, Crisdion Krstevski<sup>2,5</sup>, Minh Deo<sup>1</sup>, Daniel G. Donner<sup>4,6</sup>, Helen Kiriazis<sup>4,6</sup>, Michelle C. Flynn<sup>3</sup>, Taylah L. Gaynor<sup>2,5</sup>, Andrew J. Murphy<sup>3</sup>, Grant R. Drummond<sup>5</sup>, Alexander R. Pinto<sup>2,5\*</sup>, Rebecca H. Ritchie<sup>1,5\*</sup>.

<sup>1</sup>Heart Failure Pharmacology, Drug Discovery Biology, Monash Institute of Pharmaceutical Sciences, Parkville, VIC; <sup>2</sup>Cardiac Cellular Systems, <sup>3</sup>Haematopoiesis and Leukocyte Biology, <sup>4</sup>Preclinical Cardiology, Microsurgery & Imaging Platform, Baker Heart and Diabetes Institute, Prahran, VIC; <sup>5</sup>Department of Physiology, Microbiology and Anatomy, La Trobe University, Bundoora, VIC, <sup>6</sup>Baker Department of Cardiometabolic Health, The University of Melbourne, Parkville VIC 3010, Australia.

*\*Equal contribution*

**Supplementary Table 1** – Physiological endpoint characteristics of STZ-HFD-induced murine diabetes

| Parameters                      | ND       | DM           |
|---------------------------------|----------|--------------|
| <i>n</i>                        | 7        | 19           |
| <b>Blood glucose (mmol/mol)</b> | 8.5±0.2  | 22.9±0.5**** |
| <b>HbA1c (%)</b>                | 3.8±0.2  | 6.9±0.5**    |
| <b>Body Weight (g)</b>          | 33.3±0.9 | 33.3±0.9     |
| <b>Fat mass (g)</b>             | 8.48±2.0 | 7.51±3.9     |
| <b>Lean mass (g)</b>            | 26.7±1.9 | 26.7±1.9     |
| <b>Glucose tolerance (AUC)</b>  | 2396±163 | 4654±128**** |
| <b>Insulin tolerance (AUC)</b>  | 471±29   | 540±80       |

Physiological parameters measured to assess the degree of diabetes-mellitus (DM) in STZ-HFD treated mice at endpoint. Data presented as mean ± SEM and analysed using an unpaired t-test. Statistical significance was assumed at  $P < 0.05$ , \*\*  $P < 0.01$ , \*\*\*\*  $P < 0.0001$ . AUC = area under the curve, DM = diabetes mellitus.

**Supplementary Table 2** – Endpoint M-Mode echocardiography for assessing cardiac systolic function in murine diabetes

| Parameters                       | ND        | DM         |
|----------------------------------|-----------|------------|
| <i>n</i>                         | 7         | 19         |
| <b>Heart rate (bpm)</b>          | 390±33    | 414±16     |
| <b>AWd (mm)</b>                  | 0.73±0.04 | 0.76±0.03  |
| <b>LVEDD (mm)</b>                | 4.08±0.08 | 4.07±0.07  |
| <b>PWd (mm)</b>                  | 0.75±0.05 | 0.79±0.02  |
| <b>LVESD (mm)</b>                | 2.86±0.06 | 2.6±0.08   |
| <b>Fractional shortening (%)</b> | 29.8±1.35 | 36.1±1.47* |

Data presented as mean ± SEM and analysed using an unpaired t-test. Statistical significance was assumed at  $P < 0.05$ . AWd; anterior wall diastolic thickness, LVEDD; LV end diastolic dimension, PWd; posterior wall diastolic thickness, DM = diabetes mellitus.

**Supplementary Table 3** – Organ weights

| Organ                       | ND        | DM          |
|-----------------------------|-----------|-------------|
| <i>n</i>                    | 7         | 19          |
| Tibial length (mm)          | 18.1±0.1  | 18.1±0.1    |
| Heart weight (mg)           | 130.2±3.3 | 154.2±9.0   |
| Liver weight (g)            | 1.5±0.05  | 2.1±1.1**   |
| Spleen weight (mg)          | 99.5±3.6  | 121.7±8.5   |
| Heart weight/tibial length  | 7.2±0.2   | 7.9±0.2     |
| Liver weight/tibial length  | 84.7±2.7  | 107.7±3.8** |
| Spleen weight/tibial length | 5.5±0.2   | 7.2±0.5     |

Represents the raw organ weights and weights relative to tibia length. Data are presented as mean ± SEM and analysed by unpaired t-test. \*  $P < 0.05$ .

**Supplementary Table 4** – Flow cytometry antibody panel utilised in whole blood from mice

| <b>Antibody Target/Dye</b> | <b>Cat #</b> | <b>Company</b> | <b>Clone</b> | <b>Staining pattern</b>  |
|----------------------------|--------------|----------------|--------------|--------------------------|
| DAPI                       | D9542-5MG    | Sigma-Aldrich  | N/A          | Dead cells               |
| CD45R/B220                 | 103241       | BD Biosciences | RA3-6B2      | B-cells                  |
| CD3 $\epsilon$             | 11-0033-81   | BD Biosciences | 500A2        | T-cells                  |
| Gr1 (Ly6G/Ly6C)            | 552093       | BD Biosciences | RB6-8C5      | Monocytes & Neutrophils  |
| CD115                      | 135506       | BD Biosciences | AFS98        | Monocytes                |
| CD4                        | 116016       | BD Biosciences | RM4-4        | CD4 <sup>+</sup> T-cells |
| CD8                        | 126612       | BD Biosciences | YTS156.7.7   | CD8 <sup>+</sup> T-cells |
| CD45                       | 557659       | BD Biosciences | 30-F11       | Pan leukocytes           |

Lists the antibody cocktail utilised for whole blood flow cytometry. 7 antibodies and 1 dye (DAPI) were used in this study to detect a range of leukocytes. Note: cell types in column 5 are the identifiable cells for the purpose of this study and may not apply in different contexts. For more detailed information regarding flow cytometry gating strategies and cellular identification, see Supplementary Figure 3.

**Supplementary Table 5** – Flow cytometry antibody panel utilised in myocardium from mice

| <b>Antibody Target/Dye</b>                 | <b>Cat #</b> | <b>Company</b>  | <b>Clone</b> | <b>Staining pattern</b>    |
|--------------------------------------------|--------------|-----------------|--------------|----------------------------|
| CD31                                       | 740879       | BD Biosciences  | 390          | Endothelial cells          |
| I-A/I-E (MHCII)                            | 743876       | BD Biosciences  | 2G9          | B-cells, macrophages       |
| CD11b                                      | 564443       | BD Biosciences  | M1/70        | Myeloid cells              |
| CD64 (a & b alloantigens)                  | 740622       | BD Biosciences  | X54-5/7.1    | Macrophages                |
| CD146 (Mcam)                               | 740827       | BD Biosciences  | ME-9F1       | Mural cells                |
| eBioscience™ Calcein Blue AM Viability Dye | 65-0855-39   | Invitrogen      | N/A          | Metabolically active cells |
| Ly6C                                       | 128012       | Biolegend       | HK1.4        | Monocytes                  |
| CD59a                                      | 130-104-105  | Miltenyi Biotec | REA287       | Schwann cells              |
| Ly6G                                       | 127648       | Biolegend       | 1A8          | Granulocytes               |
| NK1.1                                      | 108716       | Biolegend       | PK136        | Natural killer cells       |
| CD39                                       | 143806       | Biolegend       | Duha59       | Smooth muscle cells        |
| SYTOX™ Green Dead Cell Stain               | S34860       | Invitrogen      | N/A          | Dead cells                 |
| CD90.2                                     | 105320       | Invitrogen      | 30-H12       | T-cells                    |
| CD45                                       | 557659       | BD Biosciences  | 30-F11       | Pan leukocytes             |

Lists the antibody cocktail utilised for flow cytometry of cardiac ventricles. 12 antibodies and 2 dyes (SYTOX green and Calcein blue) were used in this study to detect an array of cardiac non-myocytes. Note: cell types in column 5 are the identifiable cells for the purpose of this study and may not apply in different contexts. For more detailed information regarding flow cytometry gating strategies and cellular identification, see Supplementary Figure 2.

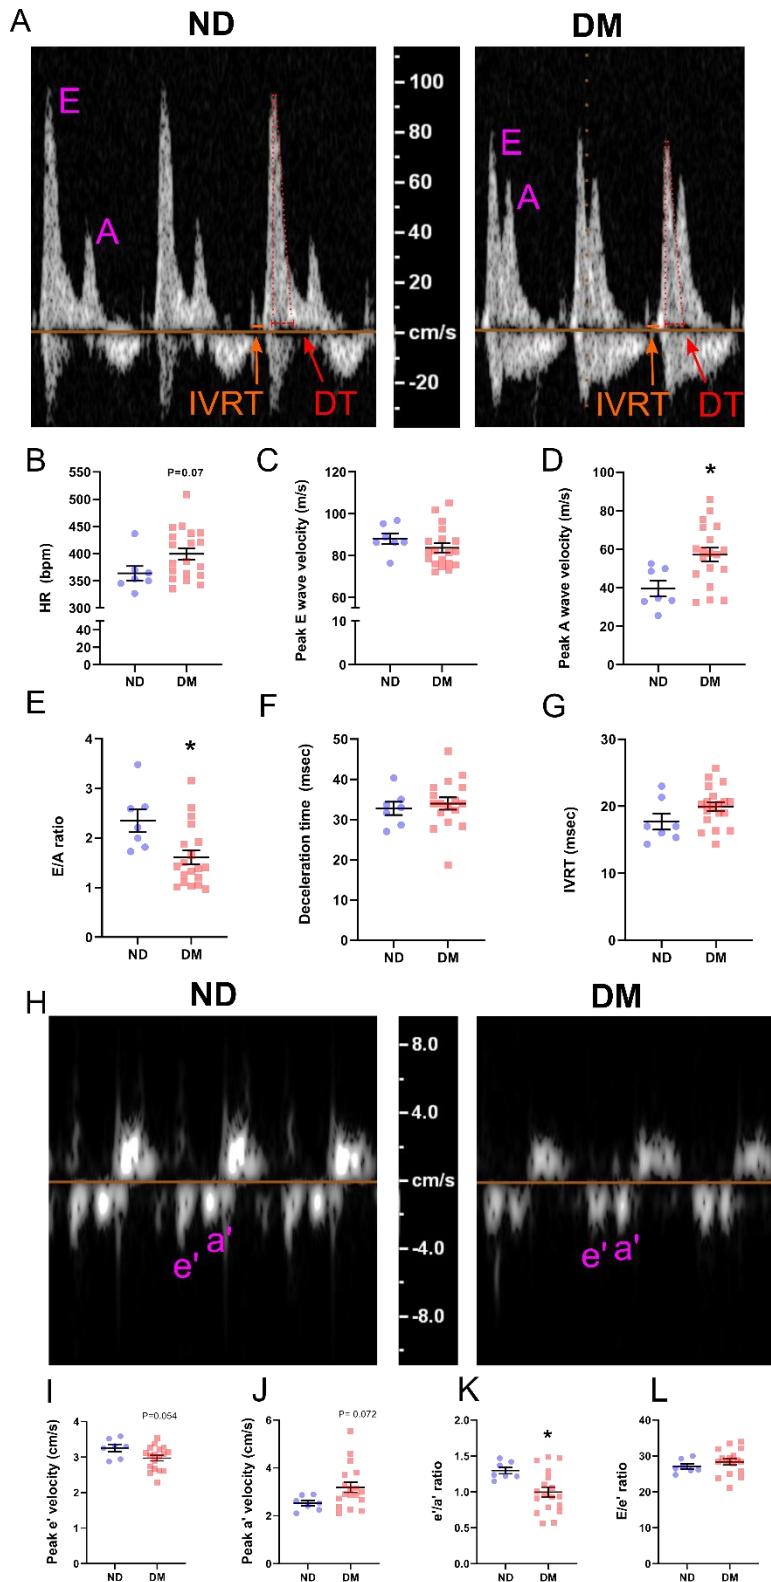

**Supplementary Figure 1:** (A) Representative images of transmitral annular blood flow via Doppler echocardiography. Quantified Doppler flow; (B) Anaesthetised heart rate (HR), (C) peak E-wave velocity, (D) A-wave velocity (E) E:A ratio, (F) deceleration time (DT) and (G) isovolumic relaxation time (IVRT). (H) Shows representative images for tissue Doppler echocardiography, quantified in figures I-L. (I) Peak e' velocity ( $P=0.054$ ), (J) peak a' velocity ( $P=0.072$ ), (K) e':a' ratio, (L) E:e' ratio. ND = non-diabetic, DM = diabetes mellitus. Data presented as mean  $\pm$  SEM and individual data points, and analysed using an unpaired t-test. Statistical significance was assumed at  $P < 0.05$ .

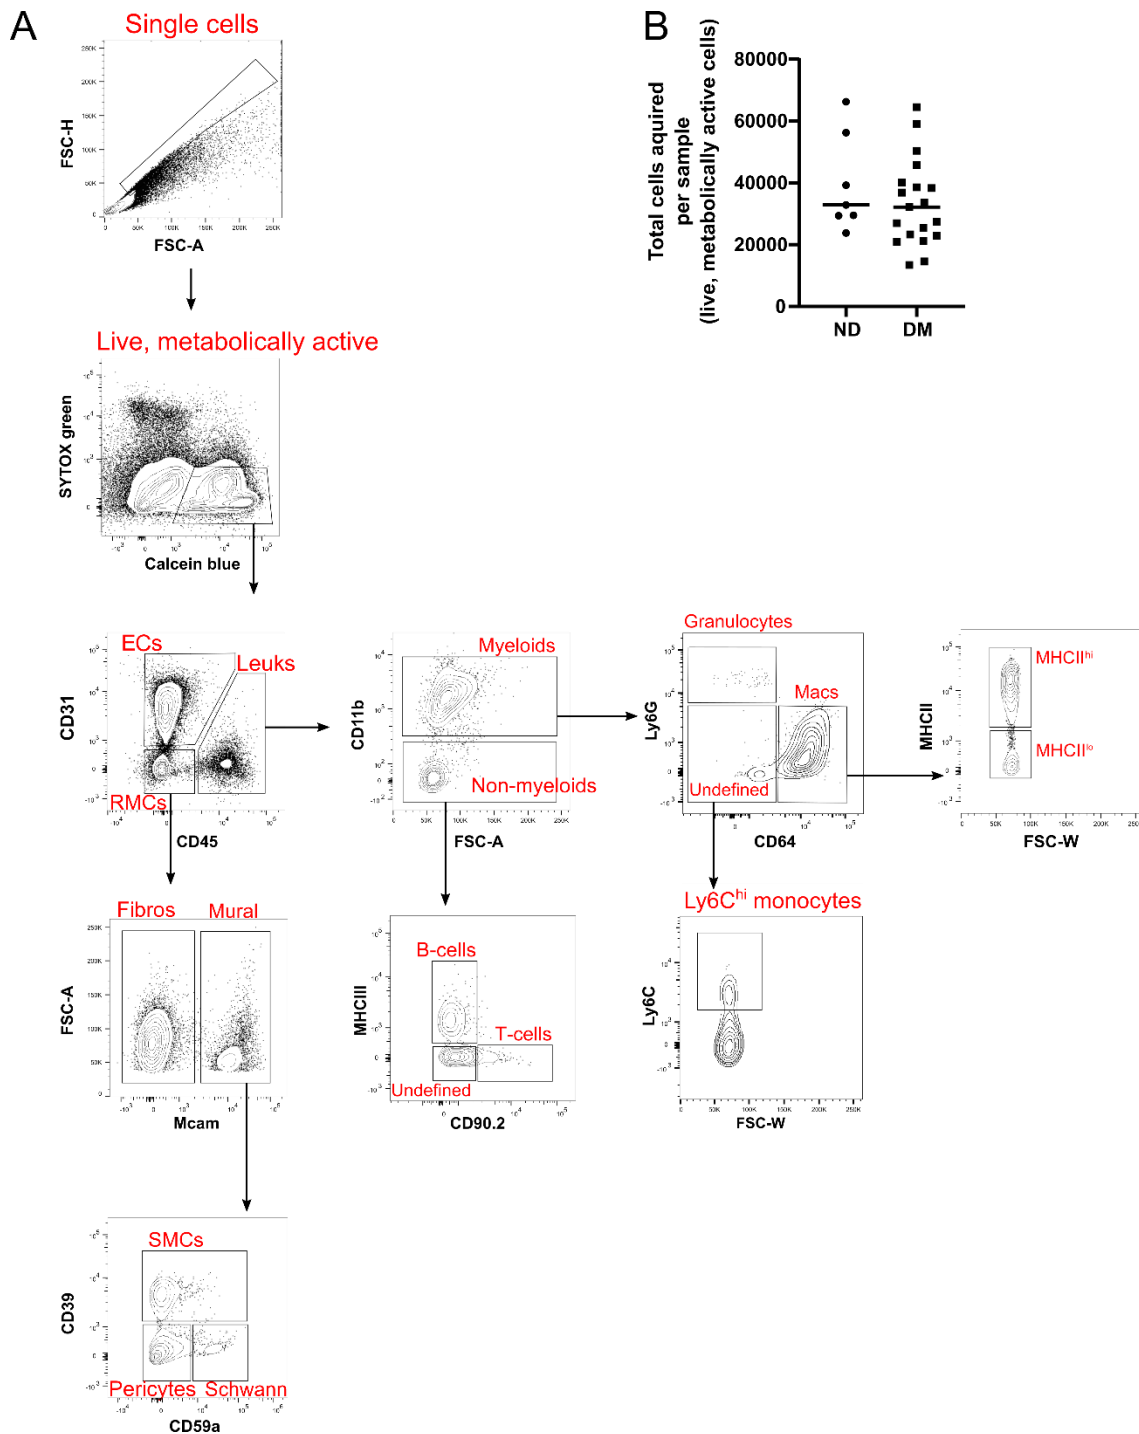

### Supplementary Figure 2: Flow cytometry gating strategies – Heart

**A)** Illustrates the gating strategies used for identification of cardiac non-myocyte cell populations. Single, intact cells are first identified by the FSC-A/FSC-H gate. Next, cells are deemed 'live and metabolically active' by gating all SYTOX-Calcein<sup>+</sup> events as indicated. Live, metabolically active cells were then identified based on their cell clustering to each respective antibody (listed on the x and y-axes). ECs = Endothelial cells, RMCs = Resident mesenchymal cells, Leuks = Leukocytes, Undefined = Undefined cells, Macs = Macrophages, MHCII<sup>hi/lo</sup> = MHCII<sup>hi/lo</sup> macrophages, Fibros = Fibroblasts, Mural = Mural cells, SMCs = Smooth Muscle Cells, Schwann = Schwann cells, FSC-A = forward scatter area, FSC-W = forward scatter width, FSC-H = forward scatter height.

**B)** Depicts the total number of live, metabolically active cells acquired per sample (from flow cytometry), split by treatment (ND = non-diabetic, DM = diabetes mellitus). Data is presented as individual values. Each line indicates the median.  $P = NS$  (Student's unpaired  $t$ -test).

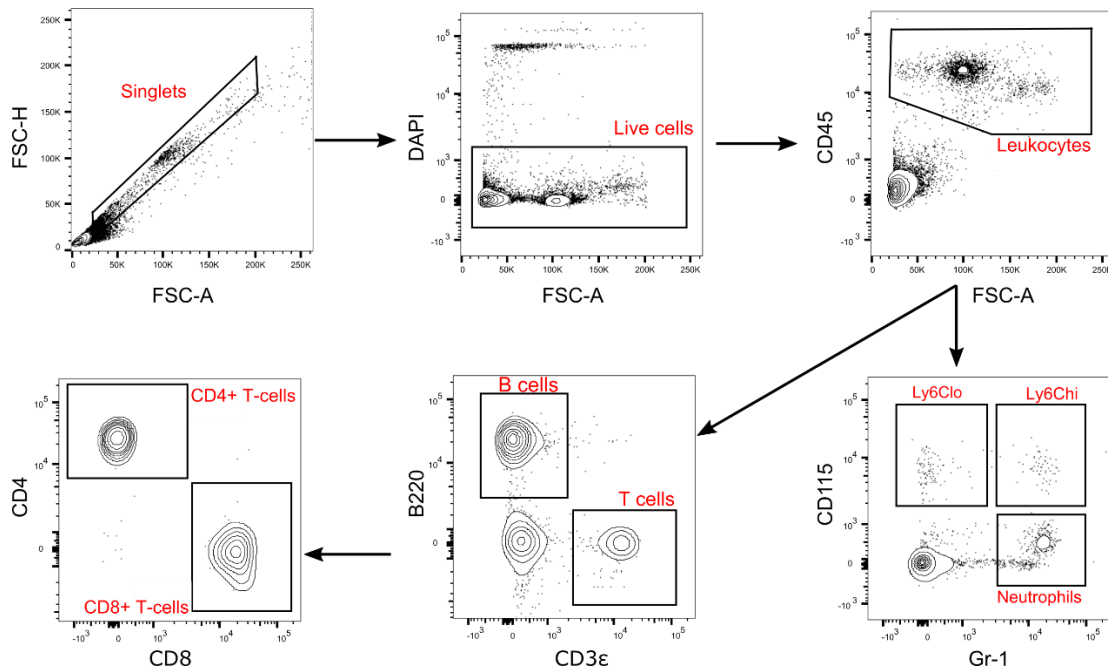

**Supplementary Figure 3 – Flow cytometry gating strategies - Blood**

Illustrates the gating strategies used for identification of circulating leukocyte populations. Single, intact cells are first identified by the FSC-A/FSC-H gate. Live cells were identified as DAPI<sup>-</sup> (4',6-diamidino-2-phenylindole), after which cells are assigned as described in Supplementary Figure 2. FSC-A = forward scatter area, FSC-W = forward scatter width, FSC-H = forward scatter height.

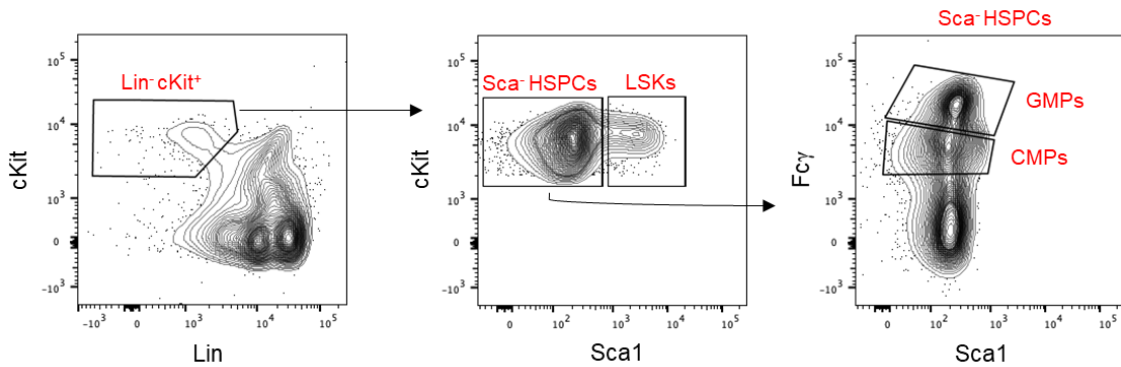

**Supplementary Figure 4 – Flow cytometry gating strategies – Bone marrow**

Illustrates the gating strategies used for identification of bone marrow progenitors. Lin<sup>-</sup> = lineage negative, HSPC = haematopoietic stem cell, LSK = lineage<sup>-</sup> cKit<sup>+</sup> cells, FSC-H = forward scatter height. Lineage cocktail = CD3, CD19, CD2, B220, TER119, CD11b, Gr-1, CD8, CD4.

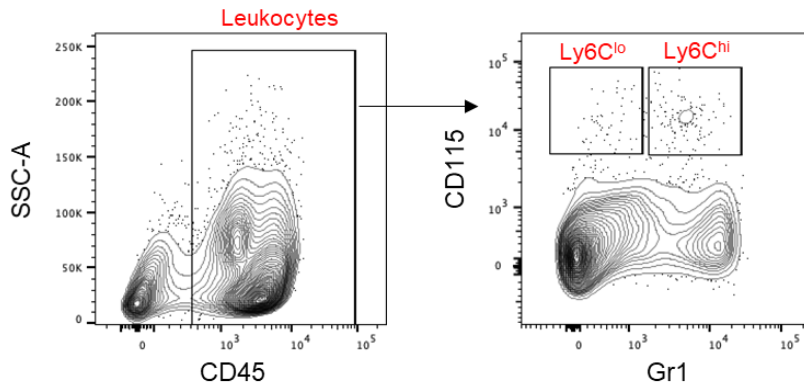

**Supplementary Figure 5 – Flow cytometry gating strategies – *Spleen***

Illustrates the gating strategies used for identification of splenic monocytes. SSC-A = side scatter area.

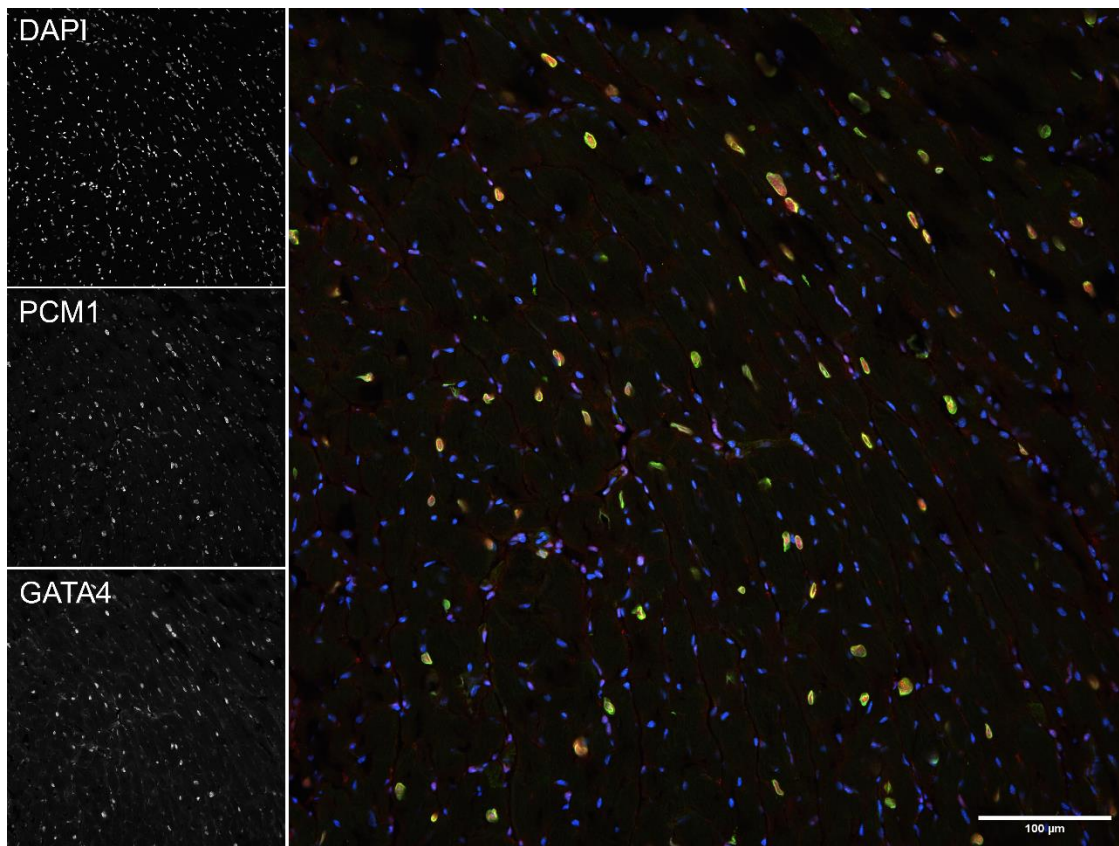

**Supplementary Figure 6 – Histological identification of resident mesenchymal cells**

Representative micrograph of murine left-ventricle stained with PCM1 and GATA4 antibodies, counter-stained with DAPI. Monochrome images (left) indicate the positive signals acquired for nuclei enumeration. Each channel is then merged and displayed in colour (right).

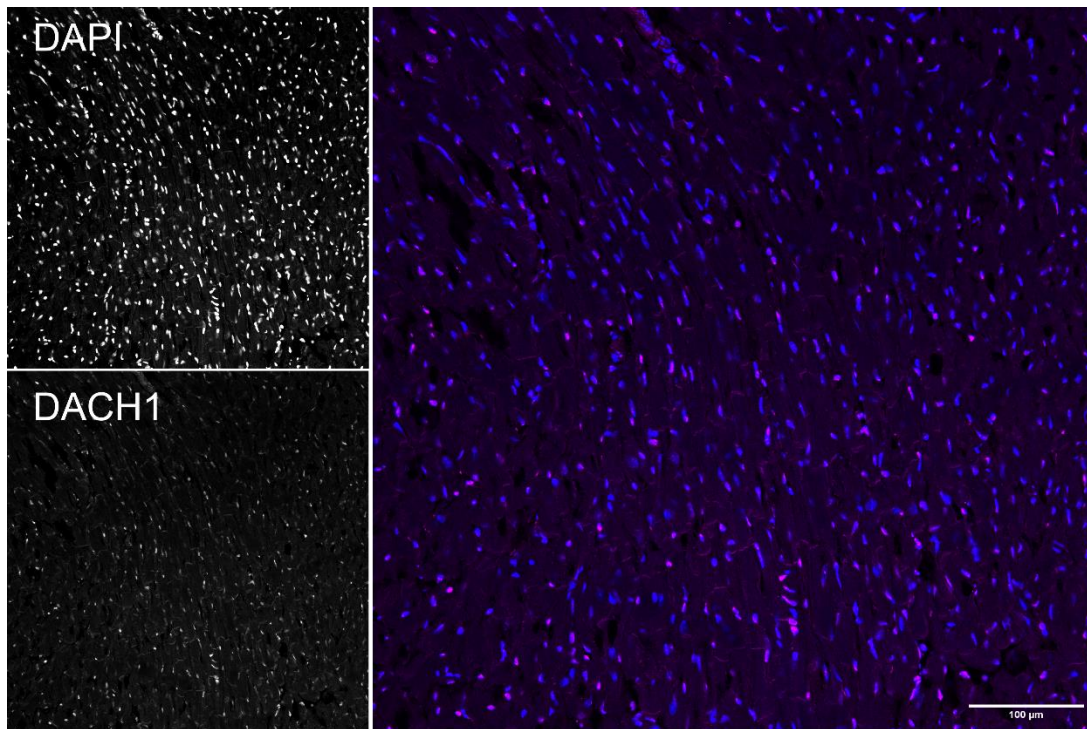

**Supplementary Figure 7 – Histological identification of endothelial cells**

Representative micrograph of murine left-ventricle stained with DACH1 and counter-stained with DAPI. Monochrome images (left) indicate the positive signals acquired for nuclei enumeration. Both channels are then merged and displayed in colour (right).



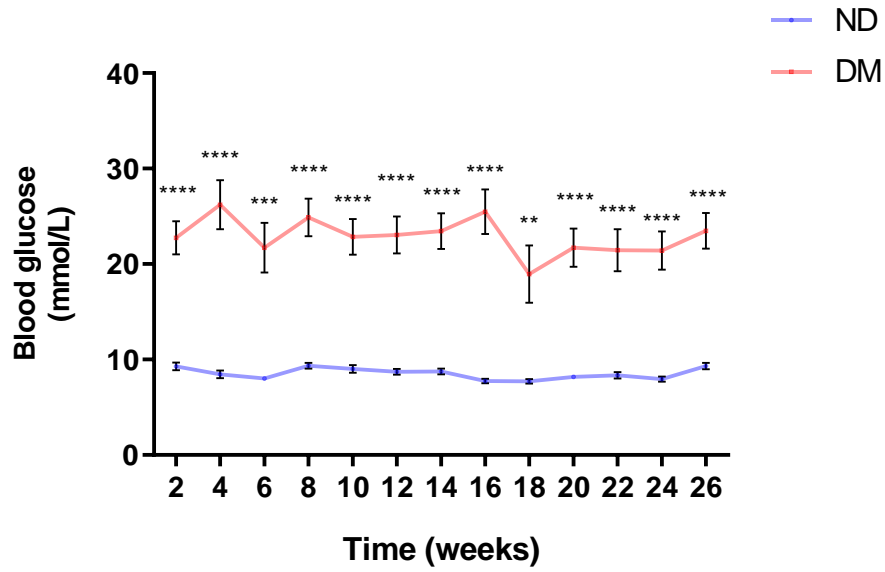

**Supplementary Figure 8 – Chronic hyperglycaemia is evident in diabetic mice throughout study duration**

Hyperglycaemia was first detected 2-weeks after the commencement of STZ-HFD administration, and remains elevated until endpoint (measured fortnightly). Data is presented as mean  $\pm$  SEM. Statistical significance was determined by a repeated measures ANOVA using a Tukey's multiple comparison post-hoc test. \*\* $P < 0.01$ , \*\*\* $P < 0.001$ , \*\*\*\* $P < 0.0001$ .
